# Supplementary figures and images for: Structure and topology around the cleavage site regulate post-translational cleavage of the HIV-1 gp160 signal peptide
Source: eLife journal article supplement (doi:10.7554/elife.26067), 2017-07-28

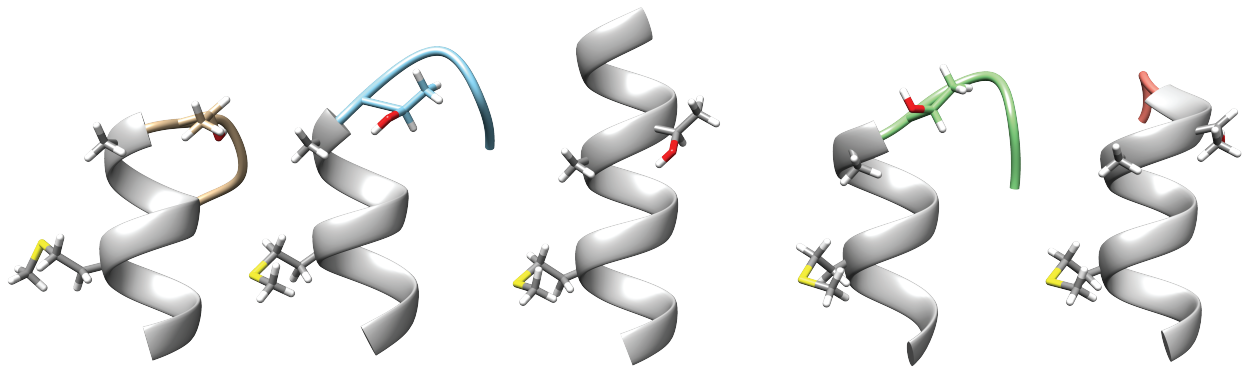

Wild-type

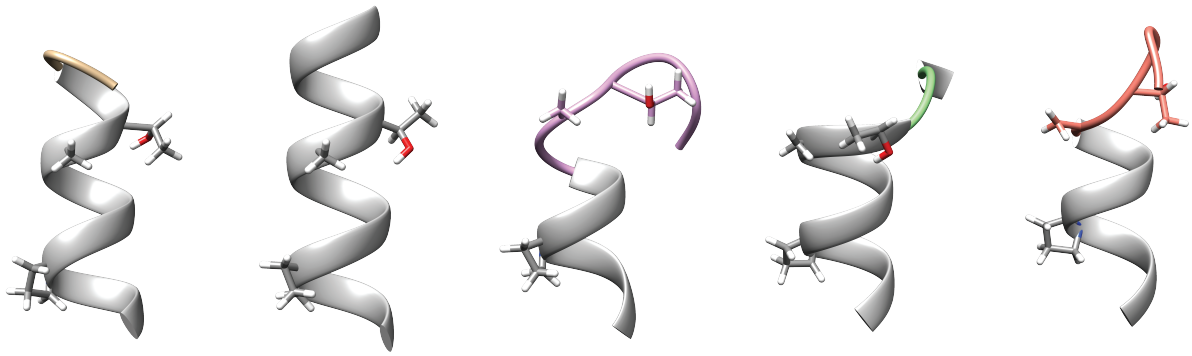

M26P

Supplement: supp [file elife-26067-supp-v1.zip]

## Viral Replication

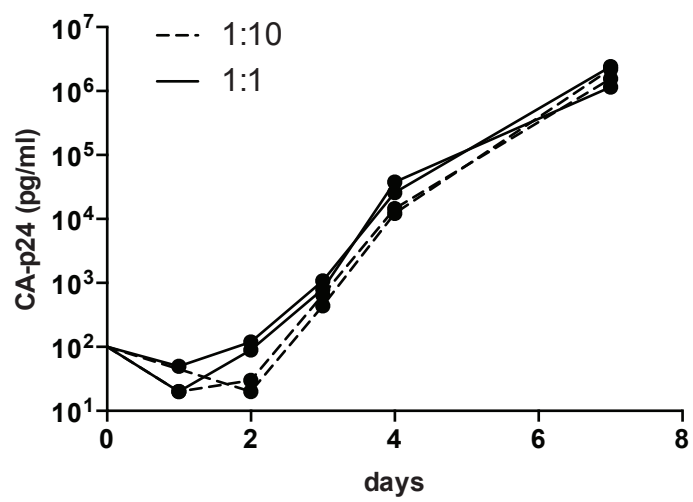

Supplement: supp [file elife-26067-supp-v1.zip]
